# Supplementary material for: Effect Of Flexi-Bar Training on Core Endurance, Dynamic Balance, and Hop Performance in Recreational Football Players: A Randomized Control Trial
Source: Research Square preprint supplement (doi:10.21203/rs.3.rs-7061729/v1), 2025-08-06
Supplement: Supplementary file 1 [file d147b1ba69414944d472eaf9.docx]

**MASTER CHART**

| SR.NO | GROUP | AGE | Height | Weight | BMI | **Y- BALANCE TEST** | | | | | | **EXTENSION TEST** | | | **CURL UP TEST** | | |
| --- | --- | --- | --- | --- | --- | --- | --- | --- | --- | --- | --- | --- | --- | --- | --- | --- | --- |
|  |  |  | in cm | in kg |  | PRE % | | **POST %** | | **FOLLOW-UP** | | **PRE** | **POST** | **FOLLOW** | **PRE** | **POST** | **FOLLOW** |
|  |  |  |  |  |  | right | left | right | left | right | left | **in seconds** | | | **number of curls** | | |
|  |  |  |  |  |  | **in percentage** | | | | | |  |  |  |  |  |  |
| 1 | 1 | 22 | 170 | 66 | 22.8 | 78.40 | 78.40 | 78.40 | 78.40 | 86.23 | 83.12 | 32.21 | 40.61 | 41.72 | 35 | 40 | 42 |
| 2 | 1 | 22 | 154 | 59 | 24.9 | 76.80 | 86.10 | 83.13 | 87.30 | 86.92 | 89.46 | 27.84 | 36.33 | 38.01 | 28 | 32 | 32 |
| 3 | 1 | 18 | 159 | 52 | 20.6 | 73.40 | 70.10 | 78.57 | 76.47 | 82.73 | 79.56 | 30 | 42.51 | 40.53 | 20 | 24 | 27 |
| 4 | 1 | 23 | 187 | 69 | 19.7 | 68.90 | 73.10 | 74.80 | 80.07 | 79.02 | 83.71 | 42 | 50.31 | 51.51 | 30 | 32 | 33 |
| 5 | 1 | 21 | 169 | 54 | 18.9 | 70.90 | 62.70 | 76.35 | 74.03 | 77.36 | 78.10 | 32 | 41.52 | 41.01 | 29 | 33 | 37 |
| 6 | 1 | 26 | 176 | 66 | 21.3 | 73.50 | 75.50 | 80.45 | 81.39 | 85.36 | 84.79 | 40 | 53.12 |  | 25 | 28 |  |
| 7 | 1 | 25 | 162 | 59 | 22.5 | 75.00 | 75.90 | 86.20 | 87.59 | 90.11 | 91.11 | 32 | 44.95 | 46 | 34 | 37 | 39 |
| 8 | 1 | 23 | 160 | 69 | 27 | 55.40 | 53.60 | 72.28 | 69.10 | 75.63 | 72.56 | 33.32 | 41.54 | 40.93 | 29 | 31 | 32 |
| 9 | 1 | 26 | 162 | 53 | 20.2 | 78.20 | 77.60 | 89.92 | 86.27 | 92.11 | 89.52 | 30.38 | 40.01 | 42.92 | 28 | 30 | 33 |
| 10 | 1 | 18 | 165 | 52 | 19.1 | 66.60 | 65.90 | 74.03 | 73.18 | 79.23 | 76.78 | 36.49 | 45.03 | 44.9 | 24 | 27 | 30 |
| 11 | 1 | 20 | 169 | 62 | 21.7 | 82.50 | 75.60 | 91.46 | 88.47 | 95.33 | 92.25 | 23.89 | 30 |  | 32 | 36 |  |
| 12 | 1 | 19 | 169 | 57 | 20 | 71.30 | 75.29 | 77.58 | 79.03 | 81.81 | 81.92 | 43.56 | 52.36 | 50.31 | 36 | 38 | 38 |
| 13 | 1 | 22 | 163 | 60 | 22.6 | 78.71 | 79.91 | 87.95 | 89.95 | 90.50 | 90.23 | 60 | 70.9 | 72 | 30 | 35 | 39 |
| 14 | 1 | 25 | 187 | 69 | 19.7 | 67.46 | 64.25 | 75.00 | 72.69 | 78.01 | 75.61 | 49.36 | 54.93 | 58.3 | 28 | 31 | 30 |
| 15 | 1 | 24 | 184 | 85 | 25.1 | 65.85 | 66.66 | 76.01 | 74.39 | 76.98 | 75.65 | 50 | 58.34 | 56.11 | 20 | 24 | 25 |
| 16 | 1 | 24 | 155 | 57 | 23.7 | 69.16 | 76.95 | 79.16 | 86.00 | 80.99 | 82.21 | 46.32 | 52.79 | 53 | 15 | 20 | 24 |
| 17 | 1 | 22 | 162 | 53 | 20.2 | 79.11 | 78.57 | 87.14 | 86.50 | 89.90 | 89.23 | 36.33 | 42.08 |  | 34 | 37 |  |
| 18 | 1 | 26 | 165 | 52 | 19.1 | 78.96 | 77.25 | 84.52 | 85.88 | 87.42 | 88.62 | 45 | 52.11 | 56.23 | 15 | 18 | 19 |
| 19 | 1 | 18 | 182 | 62 | 18.7 | 65.87 | 66.66 | 75.79 | 77.38 | 79.19 | 79.00 | 40 | 49.3 | 47.01 | 20 | 23 | 23 |
| 20 | 1 | 23 | 160 | 59 | 23 | 69.10 | 67.87 | 77.23 | 76.30 | 80.13 | 79.23 | 39.53 | 44.96 | 42.29 | 18 | 21 | 24 |
| 21 | 1 | 25 | 151 | 51 | 22.4 | 67.06 | 48.01 | 72.69 | 75.79 | 74.91 | 75.99 | 48.32 | 56.57 | 58.11 | 24 | 29 | 32 |
| 22 | 1 | 18 | 168 | 59 | 20.9 | 76.71 | 77.10 | 85.94 | 86.74 | 86.11 | 88.26 | 58 | 66.34 | 66.39 | 22 | 23 | 29 |
| 23 | 1 | 20 | 152 | 51 | 21.1 | 78.45 | 81.48 | 87.39 | 86.83 | 90.00 | 89.20 | 39.21 | 45.83 | 47 | 13 | 16 | 18 |
| 24 | 1 | 20 | 163 | 60 | 22.6 | 76.82 | 79.83 | 84.55 | 88.47 | 0.00 | 0.00 | 33.36 | 40.31 |  | 21 | 26 |  |
| 25 | 1 | 19 | 169 | 60 | 21 | 84.00 | 81.98 | 86.00 | 83.00 | 87.22 | 86.12 | 27.33 | 36.63 | 39.23 | 16 | 20 | 25 |
| 26 | 1 | 23 | 168 | 56 | 19.8 | 71.66 | 71.19 | 84.58 | 79.01 | 86.33 | 82.72 | 37 | 44.52 | 46.3 | 13 | 17 | 17 |
| 27 | 1 | 22 | 169 | 59 | 20.7 | 83.55 | 77.33 | 92.00 | 85.33 | 94.01 | 87.36 | 45.65 | 53.01 | 53.31 | 18 | 24 | 25 |
| 28 | 1 | 25 | 182 | 62 | 18.7 | 82.92 | 70.28 | 92.02 | 76.70 | 92.93 | 78.67 | 42.33 | 49.72 | 50.45 | 21 | 24 | 27 |
| 29 | 1 | 26 | 159 | 55 | 21.8 | 69.51 | 70.73 | 80.48 | 80.48 | 82.11 | 83.56 | 41.03 | 47.91 | 49.23 | 24 | 27 | 33 |
| 30 | 1 | 24 | 170 | 65 | 22.5 | 63.49 | 63.13 | 71.82 | 72.15 | 74.22 | 73.58 | 41.56 | 48.35 | 50.11 | 25 | 31 | 36 |
| 31 | 2 | 20 | 161 | 50 | 19.3 | 80.32 | 78.57 | 85.54 | 80.95 | 86.23 | 81.23 | 39.23 | 45.44 | 45.47 | 20 | 23 | 22 |
| 32 | 2 | 22 | 158 | 60 | 24 | 72.50 | 73.83 | 75.00 | 75.52 | 76.10 | 76.33 | 37 | 40.01 | 42.11 | 25 | 28 | 30 |
| 33 | 2 | 23 | 152 | 49 | 21.2 | 72.52 | 84.01 | 79.27 | 83.10 | 80.01 | 83.93 | 37.11 | 41.42 | 39.73 | 30 | 32 | 35 |
| 34 | 2 | 26 | 157 | 49 | 19.9 | 79.16 | 79.01 | 84.58 | 80.24 | 86.36 | 82.31 | 40.32 | 45.93 | 45 | 18 | 19 | 21 |
| 35 | 2 | 25 | 170 | 53 | 18.3 | 72.35 | 76.70 | 74.79 | 79.67 | 75.36 | 80.00 | 39.23 | 41.33 | 72.39 | 15 | 17 | 21 |
| 36 | 2 | 18 | 170 | 77 | 26.6 | 69.91 | 72.20 | 0.00 | 0.00 | 0.00 | 0.00 | 42.36 |  |  | 18 |  |  |
| 37 | 2 | 18 | 187 | 76 | 21.7 | 70.80 | 78.10 | 73.75 | 79.42 | 74.63 | 80.22 | 39.03 | 44 | 44.45 | 21 | 23 | 22 |
| 38 | 2 | 23 | 167 | 53 | 19 | 72.70 | 73.80 | 75.47 | 75.37 | 77.21 | 75.40 | 50 | 55.95 | 53.12 | 32 | 36 | 37 |
| 39 | 2 | 25 | 166 | 59 | 21.4 | 72.48 | 70.54 | 74.80 | 73.64 | 76.23 | 76.39 | 28.33 | 32.84 | 31.95 | 20 | 22 | 24 |
| 40 | 2 | 26 | 168 | 65 | 23 | 72.91 | 73.33 | 77.50 | 76.66 | 78.00 | 76.93 | 33.54 | 60.01 | 37.86 | 14 | 17 | 19 |
| 41 | 2 | 24 | 179 | 63 | 19.7 | 72.15 | 75.58 | 0.00 | 0.00 | 0.00 | 0.00 | 40.11 |  |  | 20 |  |  |
| 42 | 2 | 22 | 166 | 52 | 18.9 | 69.66 | 70.03 | 72.28 | 71.91 | 72.58 | 71.11 | 27.63 | 36.72 | 38.33 | 25 | 27 | 27 |
| 43 | 2 | 23 | 166 | 58 | 21 | 70.83 | 69.13 | 72.91 | 72.83 | 73.00 | 74.01 | 30.31 | 35.92 | 34.01 | 22 | 22 | 20 |
| 44 | 2 | 19 | 170 | 62 | 21.5 | 69.47 | 71.95 | 71.88 | 74.39 | 72.73 | 75.00 | 45.45 | 50.63 | 50.21 | 33 | 35 | 33 |
| 45 | 2 | 18 | 172 | 80 | 27 | 72.57 | 71.72 | 75.10 | 76.37 | 76.92 | 77.00 | 54.31 | 58.11 | 57.88 | 14 | 13 | 14 |
| 46 | 2 | 22 | 170 | 53 | 18.3 | 68.16 | 71.96 | 70.78 | 74.24 | 70.78 | 74.25 | 31.01 | 39.52 | 40.19 | 35 | 38 | 39 |
| 47 | 2 | 23 | 169 | 66 | 23.1 | 72.91 | 74.48 | 77.08 | 77.77 | 78.00 | 78.00 | 39.92 | 42.19 | 41.36 | 25 | 26 | 30 |
| 48 | 2 | 26 | 165 | 55 | 20.2 | 71.48 | 69.84 | 73.89 | 75.39 | 74.22 | 75.00 | 60.6 | 62.19 | 60.35 | 30 | 33 | 36 |
| 49 | 2 | 25 | 170 | 65 | 22.5 | 68.56 | 69.87 | 77.23 | 73.09 | 78.23 | 75.11 | 58.31 | 60.12 | 61.96 | 28 | 31 | 32 |
| 50 | 2 | 22 | 156 | 49 | 20.1 | 71.03 | 72.22 | 73.80 | 74.20 | 74.83 | 75.00 | 30 | 33.94 | 33.85 | 27 | 29 | 31 |
| 51 | 2 | 18 | 172 | 76 | 25.7 | 75.92 | 77.16 | 79.16 | 81.73 | 80.11 | 82.90 | 25.11 | 29.23 | 30.73 | 13 | 15 | 17 |
| 52 | 2 | 18 | 155 | 55 | 22.9 | 72.15 | 73.50 | 74.68 | 62.39 | 76.90 | 62.43 | 30.3 | 35.09 | 34.99 | 17 | 17 | 16 |
| 53 | 2 | 18 | 169 | 59 | 20.7 | 72.57 | 73.50 | 76.37 | 77.35 | 76.37 | 77.35 | 39.4 | 42.32 | 45.17 | 15 | 18 | 20 |
| 54 | 2 | 19 | 166 | 59 | 21.4 | 74.16 | 69.58 | 79.16 | 76.66 | 81.23 | 78.16 | 45.63 | 51.53 | 53.51 | 23 | 25 | 28 |
| 55 | 2 | 22 | 154 | 50 | 21.1 | 74.89 | 75.72 | 79.42 | 78.18 | 80.29 | 79.00 | 49.35 | 52.12 | 54.96 | 28 | 31 | 29 |
| 56 | 2 | 20 | 161 | 50 | 19.3 | 67.46 | 69.04 | 68.18 | 70.07 | 68.18 | 70.07 | 56.34 | 60.11 | 61.32 | 23 | 26 | 29 |
| 57 | 2 | 20 | 166 | 52 | 18.9 | 62.45 | 64.75 | 65.90 | 68.96 | 67.61 | 69.23 | 50.51 | 50.93 | 49 | 20 | 21 | 23 |
| 58 | 2 | 21 | 155 | 55 | 22.9 | 62.83 | 65.90 | 0.00 | 0.00 | 0.00 | 0.00 | 22.32 |  |  | 24 |  |  |
| 59 | 2 | 21 | 152 | 49 | 21.2 | 67.41 | 66.66 | 69.66 | 70.41 | 71.23 | 71.52 | 32.33 | 36.92 | 37.21 | 32 | 34 | 35 |
| 60 | 2 | 23 | 156 | 49 | 20.1 | 68.69 | 71.13 | 74.39 | 74.79 | 75.00 | 74.79 | 42.98 | 48.61 | 50 | 30 | 32 | 37 |

| **SIDE PLANK TEST** | | | | | | **SIDE HOP TEST** | | | | | |  | **TRIPLE HOP TEST** | | | | | **VERTICAL JUMP** | | | |
| --- | --- | --- | --- | --- | --- | --- | --- | --- | --- | --- | --- | --- | --- | --- | --- | --- | --- | --- | --- | --- | --- |
| **PRE** | | **POST** | | **FOLLOW UP** | | **PRE** | | **POST** | | **FOLLOW-UP** | | **PRE** | | **POST** | | **FOLLOW UP** | | **PRE** | **POST** | **FOLLOW UP** | |
| right | left | right | left | right | left | right | left | right | left | right | left | right | left | right | left | right | left |  |  |  |  |
| **in seconds** | | | | | | **number of hops** | | | | | | **in cm** | | | | | | **in cm** | | |  |
| 55.55 | 60 | 60.36 | 62 | 62.43 | 62.53 | 12 | 10 | 14 | 12 | 16 | 13 | 429 | 442 | 437 | 450 | 441 | 454.4 | 70 | 73 | 74.1 |  |
| 40.24 | 34.67 | 46.12 | 40.93 | 47.53 | 42.74 | 13 | 13 | 14 | 14 | 15 | 16 | 341 | 369 | 352 | 373 | 357 | 374 | 55.3 | 57.2 | 58 |  |
| 48 | 52 | 52 | 54 | 54 | 57 | 14 | 12 | 13 | 14 | 14 | 16 | 289 | 274 | 294 | 277 | 296 | 280 | 60.7 | 62.2 | 63.9 |  |
| 50 | 52 | 58 | 52 | 62 | 55 | 15 | 8 | 12 | 10 | 16 | 12 | 384 | 357 | 389 | 362 | 395 | 367 | 65.5 | 68 | 69.2 |  |
| 42.11 | 40.93 | 48 | 40.01 | 51.18 | 47 | 16 | 11 | 14 | 13 | 15 | 15 | 283 | 296 | 288 | 301 | 292 | 305 | 69.9 | 72.3 | 73.6 |  |
| 59 | 52 | 64.01 | 58.19 |  |  | 17 | 13 | 12 | 14 |  |  | 243 | 194 | 250 | 198 |  |  | 61.5 | 63.1 |  |  |
| 42 | 45 | 48.32 | 48 | 53.58 | 50.36 | 18 | 10 | 12 | 13 | 15 | 15 | 274 | 251 | 279 | 256 | 287 | 362 | 63.2 | 64.1 | 65 |  |
| 43.33 | 42.41 | 53.19 | 50.36 | 55.23 | 52.36 | 19 | 7 | 12 | 9 | 16 | 12 | 196 | 206 | 202 | 209 | 206 | 214 | 50.5 | 52.3 | 52.9 |  |
| 42.35 | 40.11 | 45.48 | 44.32 | 46.98 | 44.99 | 20 | 13 | 15 | 14 | 17 | 18 | 252 | 239 | 259 | 245 | 265 | 250 | 65.4 | 67.9 | 68.1 |  |
| 56 | 50 | 65.01 | 51 | 69.74 | 52.33 | 21 | 10 | 13 | 12 | 16 | 14 | 312 | 375 | 319 | 385 | 323 | 387 | 68.8 | 70.1 | 70.9 |  |
| 43.32 | 41.99 | 43.78 | 46.53 |  |  | 12 | 10 | 15 | 14 | 18 | 16 | 295 | 281 | 300 | 286 |  |  | 60.2 | 63.3 |  |  |
| 50 | 52.11 | 55.12 | 54.68 | 58.23 | 57.76 | 13 | 12 | 16 | 14 | 18 | 17 | 394 | 385 | 401 | 392 | 407 | 400 | 68.2 | 70.1 | 73.3 |  |
| 30 | 46.39 | 35.33 | 50.12 | 37.98 | 53.73 | 10 | 11 | 12 | 14 | 15 | 15 | 342 | 476 | 349 | 481 | 355 | 488 | 70.8 | 73.2 | 74.5 |  |
| 39.23 | 33 | 44.57 | 38.33 | 47.36 | 40.01 | 10 | 10 | 13 | 12 | 16 | 15 | 352 | 369 | 356 | 373 | 361 | 380 | 61.5 | 65.5 | 66.1 |  |
| 40.44 | 49.59 | 48.5 | 54.78 | 49.95 | 56.21 | 8 | 8 | 13 | 10 | 17 | 12 | 274 | 287 | 275 | 289 | 280 | 292 | 55.6 | 58.7 | 59.3 |  |
| 50 | 49.32 | 57.22 | 52.48 | 60.36 | 56.54 | 13 | 12 | 15 | 14 | 17 | 16 | 312 | 345 | 316 | 346 | 322 | 348 | 69.1 | 72.3 | 73.6 |  |
| 42.22 | 38.82 | 48.63 | 45.28 |  |  | 10 | 8 | 14 | 11 |  |  | 385 | 362 | 390 | 366 |  |  | 62.5 | 64.7 |  |  |
| 55 | 53 | 63.22 | 68.12 | 66 | 68.23 | 11 | 7 | 15 | 12 | 22 | 17 | 248 | 200 | 253 | 206 | 257 | 210 | 63.2 | 64.9 | 66.2 |  |
| 60 | 70 | 64.33 | 72.19 | 67.8 | 73.2 | 12 | 8 | 14 | 10 | 17 | 11 | 264 | 293 | 268 | 297 | 272 | 300 | 65 | 67.3 | 68 |  |
| 60 | 53 | 63.98 | 62.63 | 67.01 | 63.23 | 10 | 7 | 13 | 11 | 16 | 13 | 315 | 390 | 320 | 392 | 324 | 395 | 58 | 60.3 | 62.2 |  |
| 39.23 | 37.33 | 44.15 | 42.45 | 46.98 | 45.36 | 13 | 10 | 14 | 11 | 15 | 13 | 375 | 352 | 379 | 357 | 385 | 359 | 63.5 | 67 | 68 |  |
| 55.5 | 58.45 | 60.23 | 61.43 | 64.36 | 65.38 | 15 | 13 | 18 | 14 | 21 | 17 | 475 | 453 | 480 | 458 | 489 | 466 | 70.1 | 72.3 | 74 |  |
| 35.23 | 23.79 | 40.33 | 25.9 | 41.68 | 26.21 | 12 | 10 | 15 | 11 | 17 | 19 | 278 | 293 | 282 | 295 | 290 | 301 | 61.9 | 64.7 | 67 |  |
| 41.3 | 38.98 | 48.58 | 44.32 |  |  | 9 | 8 | 11 | 12 |  |  | 329 | 342 | 335 | 348 |  |  | 65.2 | 68.1 |  |  |
| 39.03 | 34.58 | 45.19 | 45.33 | 48.38 | 49.6 | 7 | 8 | 10 | 12 | 14 | 16 | 241 | 269 | 245 | 273 | 249 | 276 | 58.4 | 60.1 | 61 |  |
| 49.2 | 43.63 | 59.17 | 50.72 | 63.23 | 54.93 | 10 | 7 | 12 | 9 | 16 | 12 | 375 | 392 | 380 | 394 | 384 | 400 | 60.9 | 61.3 | 63 |  |
| 36.91 | 32.23 | 43.18 | 40.4 | 47.36 | 44.28 | 11 | 11 | 13 | 11 | 16 | 13 | 415 | 392 | 421 | 399 | 424 | 402 | 59.8 | 60 | 62.1 |  |
| 39.23 | 40.44 | 49.39 | 48.02 | 50.43 | 50 | 12 | 9 | 15 | 13 | 18 | 16 | 279 | 256 | 284 | 260 | 290 | 263 | 67.1 | 69.5 | 70.3 |  |
| 49 | 45.55 | 56.39 | 51.27 | 58.93 | 54.33 | 10 | 8 | 13 | 11 | 17 | 14 | 312 | 346 | 317 | 349 | 325 | 356 | 65 | 66.8 | 68.5 |  |
| 51.23 | 52 | 57.66 | 57.92 | 61.26 | 58 | 9 | 9 | 12 | 11 | 15 | 15 | 410 | 395 | 414 | 399 | 420 | 409 | 70.3 | 71.9 | 73 |  |
| 41.93 | 46 | 50.1 | 50.36 | 53.62 | 52.33 | 10 | 7 | 12 | 7 | 14 | 10 | 385 | 362 | 387 | 365 | 390 | 369 | 62.3 | 64.6 | 64.9 |  |
| 39.13 | 31.33 | 42.66 | 39.58 | 46.29 | 42.38 | 11 | 7 | 12 | 9 | 13 | 11 | 349 | 312 | 352 | 313 | 354 | 316 | 69 | 73.5 | 74 |  |
| 43.23 | 37.89 | 49.3 | 42 | 51.23 | 44 | 12 | 7 | 12 | 7 | 13 | 9 | 272 | 287 | 274 | 289 | 278 | 290 | 59.9 | 60.8 | 61.1 |  |
| 36.33 | 32.43 | 45.7 | 42.53 | 57.1 | 43.23 | 10 | 10 | 12 | 10 | 14 | 12 | 392 | 375 | 394 | 374 | 396 | 375 | 66.1 | 68.6 | 68.9 |  |
| 23.23 | 29 | 28.18 | 29.3 | 30.31 | 30.3 | 14 | 12 | 17 | 13 | 17 | 14 | 318 | 295 | 320 | 299 | 322 | 300 | 68.7 | 72.3 | 72.8 |  |
| 50.93 | 48.33 |  |  |  |  | 13 | 9 |  |  |  |  | 382 | 370 |  |  |  |  | 57.9 |  |  |  |
| 40.22 | 36.03 | 49.39 | 42.89 | 51.1 | 42.99 | 9 | 8 | 11 | 12 | 12 | 12 | 298 | 282 | 299 | 284 | 301 | 287 | 58.3 | 62 | 62.8 |  |
| 49.83 | 48.11 | 56.92 | 51.36 | 58.01 | 52.36 | 10 | 6 | 12 | 9 | 14 | 11 | 300 | 293 | 302 | 294 | 305 | 295 | 69.2 | 73.5 | 74 |  |
| 30.62 | 35.68 | 33.92 | 34.53 | 35 | 35.01 | 11 | 11 | 14 | 12 | 14 | 13 | 275 | 270 | 278 | 272 | 278 | 274 | 60.2 | 62.5 | 62.6 |  |
| 42.89 | 34.2 | 48.32 | 36.78 | 51 | 38.36 | 8 | 7 | 10 | 7 | 12 | 10 | 198 | 187 | 201 | 189 | 203 | 190 | 52.3 | 54.6 | 55 |  |
| 28.11 | 25 |  |  |  |  | 12 | 14 |  |  |  |  | 215 | 235 |  |  |  |  | 62.9 |  |  |  |
| 41.41 | 40.93 | 43.02 | 40.12 | 44.48 | 42.36 | 11 | 9 | 12 | 10 | 14 | 11 | 398 | 379 | 401 | 382 | 404 | 383 | 70.3 | 71.1 | 72 |  |
| 49.83 | 47.39 | 51.22 | 50.44 | 53.23 | 50.42 | 6 | 6 | 10 | 8 | 11 | 10 | 325 | 318 | 328 | 321 | 331 | 322 | 62.8 | 63.3 | 64 |  |
| 32.9 | 32 | 36.38 | 34.58 | 37 | 36 | 10 | 7 | 12 | 12 | 14 | 14 | 323 | 309 | 326 | 311 | 328 | 314 | 67.7 | 69.2 | 7 |  |
| 54.1 | 50 | 56.2 | 51.23 | 58.23 | 51.99 | 7 | 6 | 9 | 9 | 10 | 10 | 190 | 176 | 190 | 175 | 192 | 177 | 49.7 | 51.3 | 53.9 |  |
| 48.19 | 47.22 | 51.29 | 47.29 | 52.11 | 48.41 | 14 | 11 | 15 | 13 | 15 | 14 | 372 | 355 | 374 | 357 | 375 | 359 | 71.5 | 72.1 | 72.3 |  |
| 39.48 | 41.32 | 43.66 | 45.1 | 45.1 | 45.95 | 11 | 7 | 12 | 10 | 13 | 12 | 219 | 189 | 220 | 192 | 223 | 194 | 61.1 | 61.9 | 62.1 |  |
| 49.5 | 48.44 | 53.13 | 50.36 | 53.11 | 52.13 | 10 | 10 | 12 | 11 | 13 | 11 | 375 | 356 | 379 | 358 | 381 | 386 | 65.5 | 66.1 | 66.7 |  |
| 41 | 40.32 | 44.61 | 40.1 | 46.7 | 41.23 | 11 | 7 | 13 | 8 | 15 | 9 | 412 | 382 | 417 | 386 | 420 | 387 | 67.2 | 68 | 68.3 |  |
| 36.52 | 29.83 | 39.63 | 32.12 | 41 | 33.33 | 9 | 7 | 13 | 9 | 14 | 12 | 343 | 329 | 344 | 331 | 473 | 333 | 63.2 | 65.2 | 65.7 |  |
| 44.41 | 42.14 | 46.52 | 44.98 | 48.36 | 45 | 12 | 9 | 15 | 14 | 16 | 16 | 158 | 145 | 161 | 146 | 163 | 146 | 40.3 | 42.5 | 43.1 |  |
| 49.31 | 34.61 | 51.01 | 39.23 | 53.92 | 41.01 | 7 | 7 | 8 | 7 | 8 | 8 | 192 | 185 | 194 | 186 | 196 | 186.6 | 45.8 | 46 | 48.2 |  |
| 33.93 | 30 | 63.23 | 32.78 | 36.29 | 33.01 | 8 | 9 | 10 | 11 | 12 | 12 | 198 | 188 | 201 | 192 | 202 | 193 | 42 | 42 | 43 |  |
| 31.92 | 32.48 | 33.81 | 34.11 | 36.23 | 35.93 | 7 | 9 | 10 | 12 | 13 | 14 | 215 | 189 | 217 | 191 | 220 | 192 | 64.2 | 66 | 66.2 |  |
| 39.43 | 39.11 | 41.39 | 40.56 | 41.98 | 41.36 | 10 | 10 | 11 | 13 | 12 | 12 | 225 | 200 | 227 | 201 | 229 | 201 | 68.7 | 69.9 | 70 |  |
| 42.69 | 41.98 | 42.93 | 43.17 | 43.11 | 45.99 | 9 | 8 | 11 | 11 | 13 | 12 | 395 | 372 | 395 | 374 | 396 | 376 | 69.2 | 69.93 | 71.2 |  |
| 39.03 | 36.52 | 41.78 | 36.78 | 42 | 38.36 | 11 | 11 | 12 | 11 | 14 | 11 | 389 | 388 | 391 | 390 | 393 | 393 | 62.6 | 63.1 | 64.2 |  |
| 40 | 34 |  |  |  |  | 9 | 7 |  |  |  |  | 387 | 382 |  |  |  |  | 56.5 |  |  |  |
| 33.88 | 28.88 | 34.12 | 31.63 | 36.11 | 32 | 10 | 10 | 12 | 11 | 12 | 11 | 245 | 323 | 247 | 234 | 250 | 235 | 60.1 | 62.3 | 63 |  |
| 37.98 | 35.11 | 40.23 | 35.85 | 41.33 | 36 | 10 | 9 | 11 | 11 | 12 | 10 | 229 | 230 | 231 | 230 | 232 | 231 | 66.4 | 66.6 | 66.9 |  |
